# Supplementary material for: FLIM-Based Intracellular and Extracellular pH Measurements Using Genetically Encoded pH Sensor
Source: MDPI journal article supplement (doi:10.3390/bios11090340), 2021-09-15
Supplement: s1 [file s1]

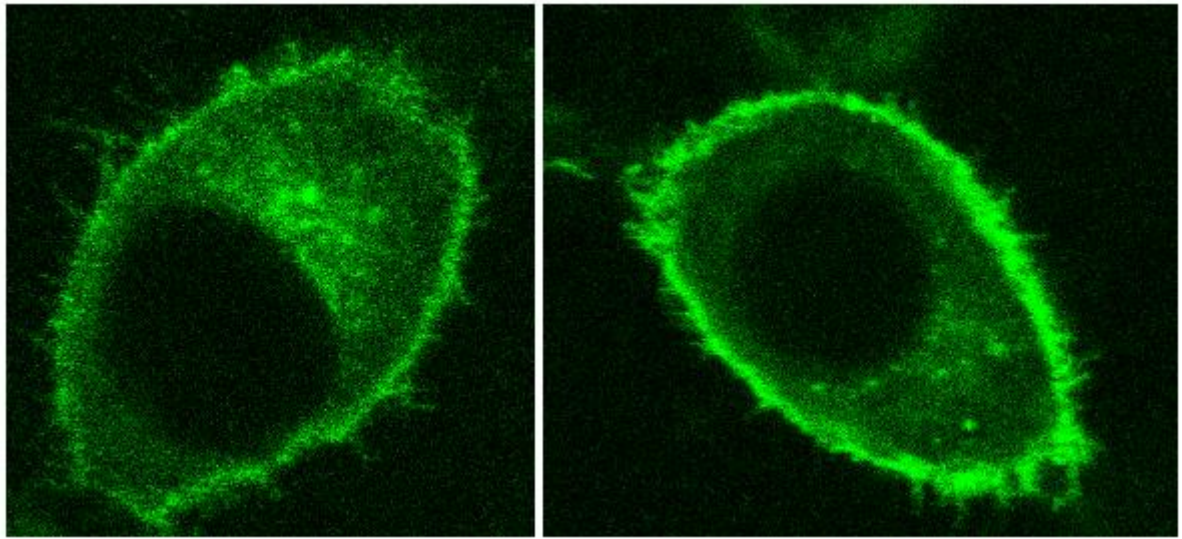

**Figure S1.** Fluorescent images of the fixed HeLa cells expressing SypHerExtra sensor.

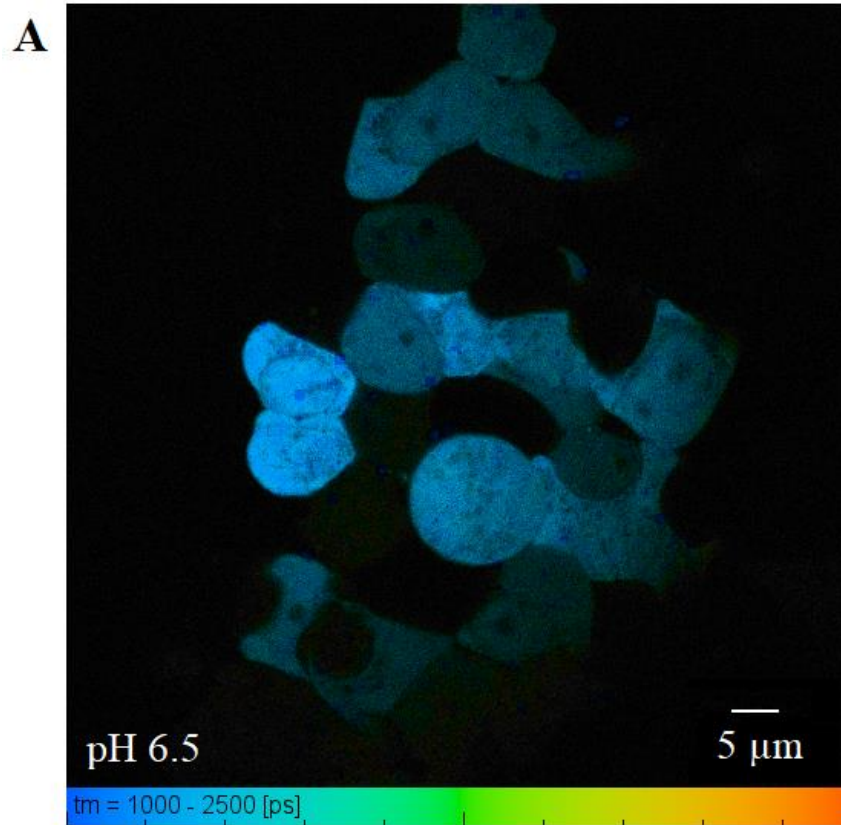

**B**

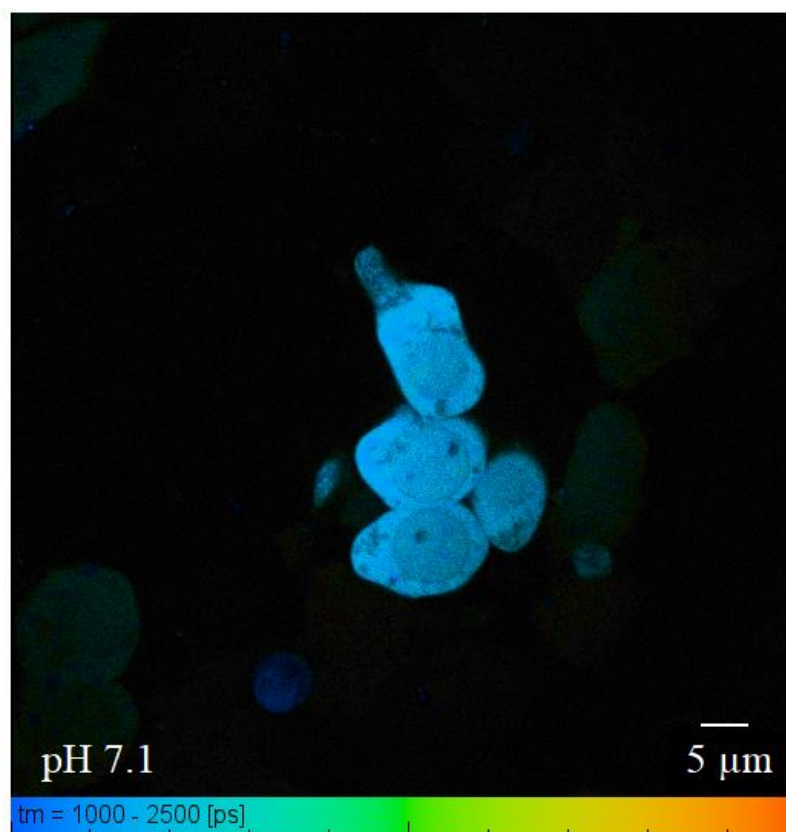

**C**

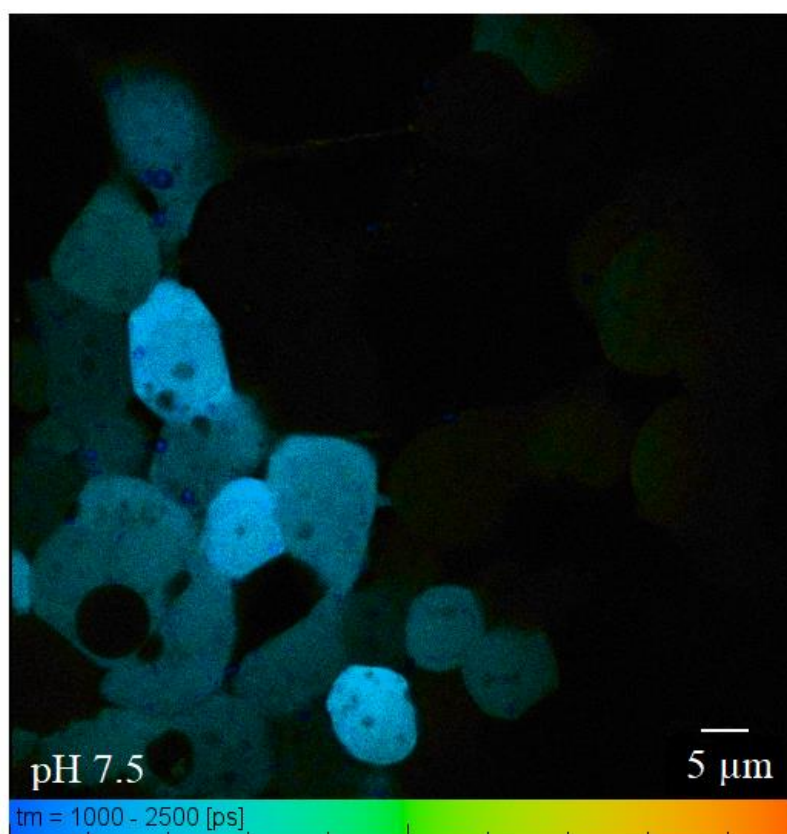

**D**

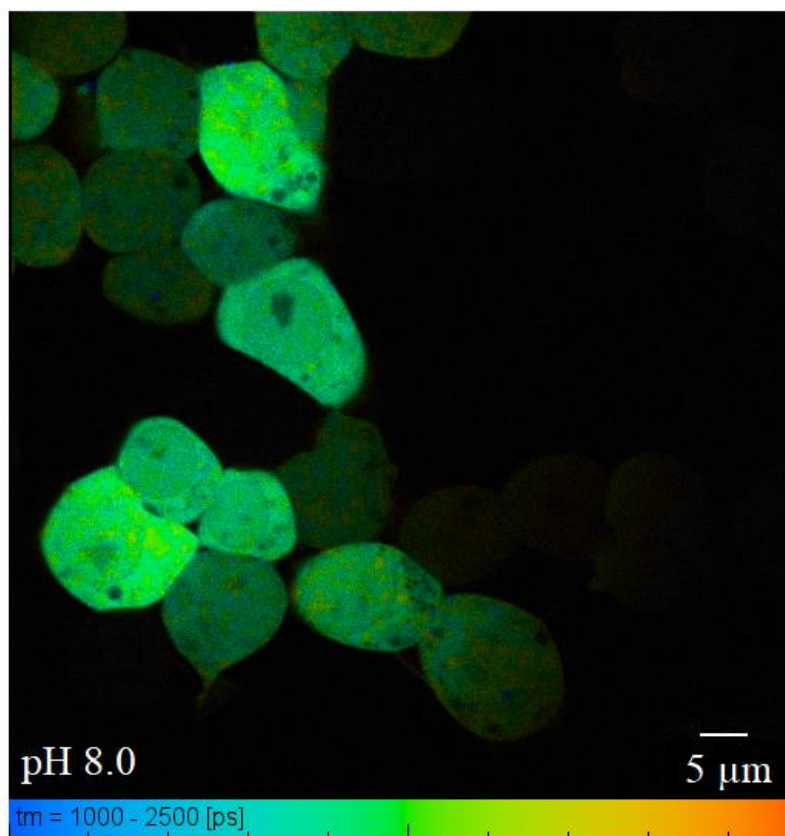

**E**

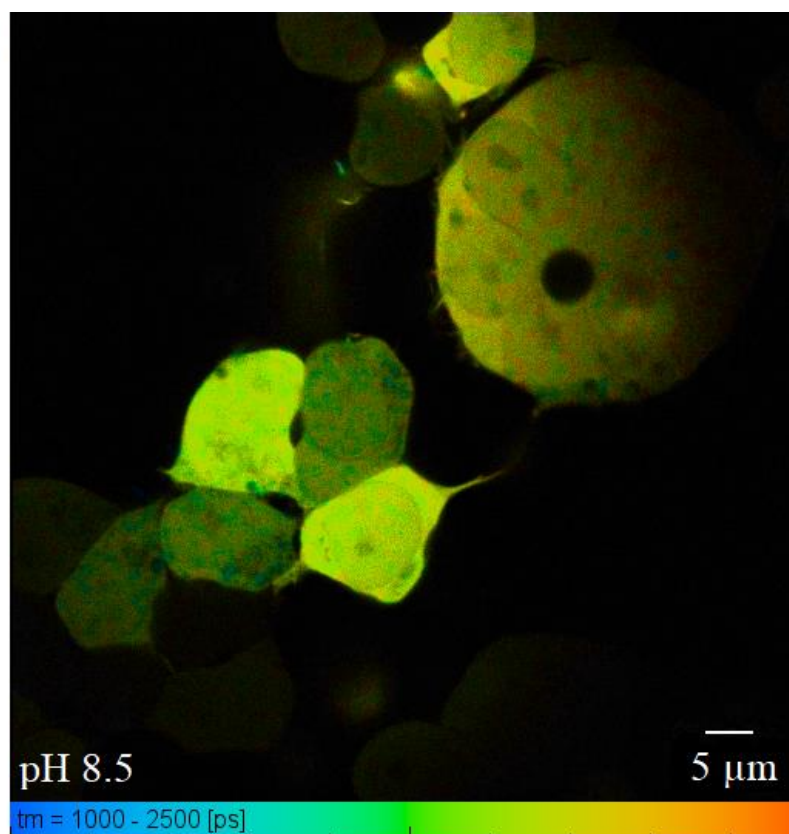

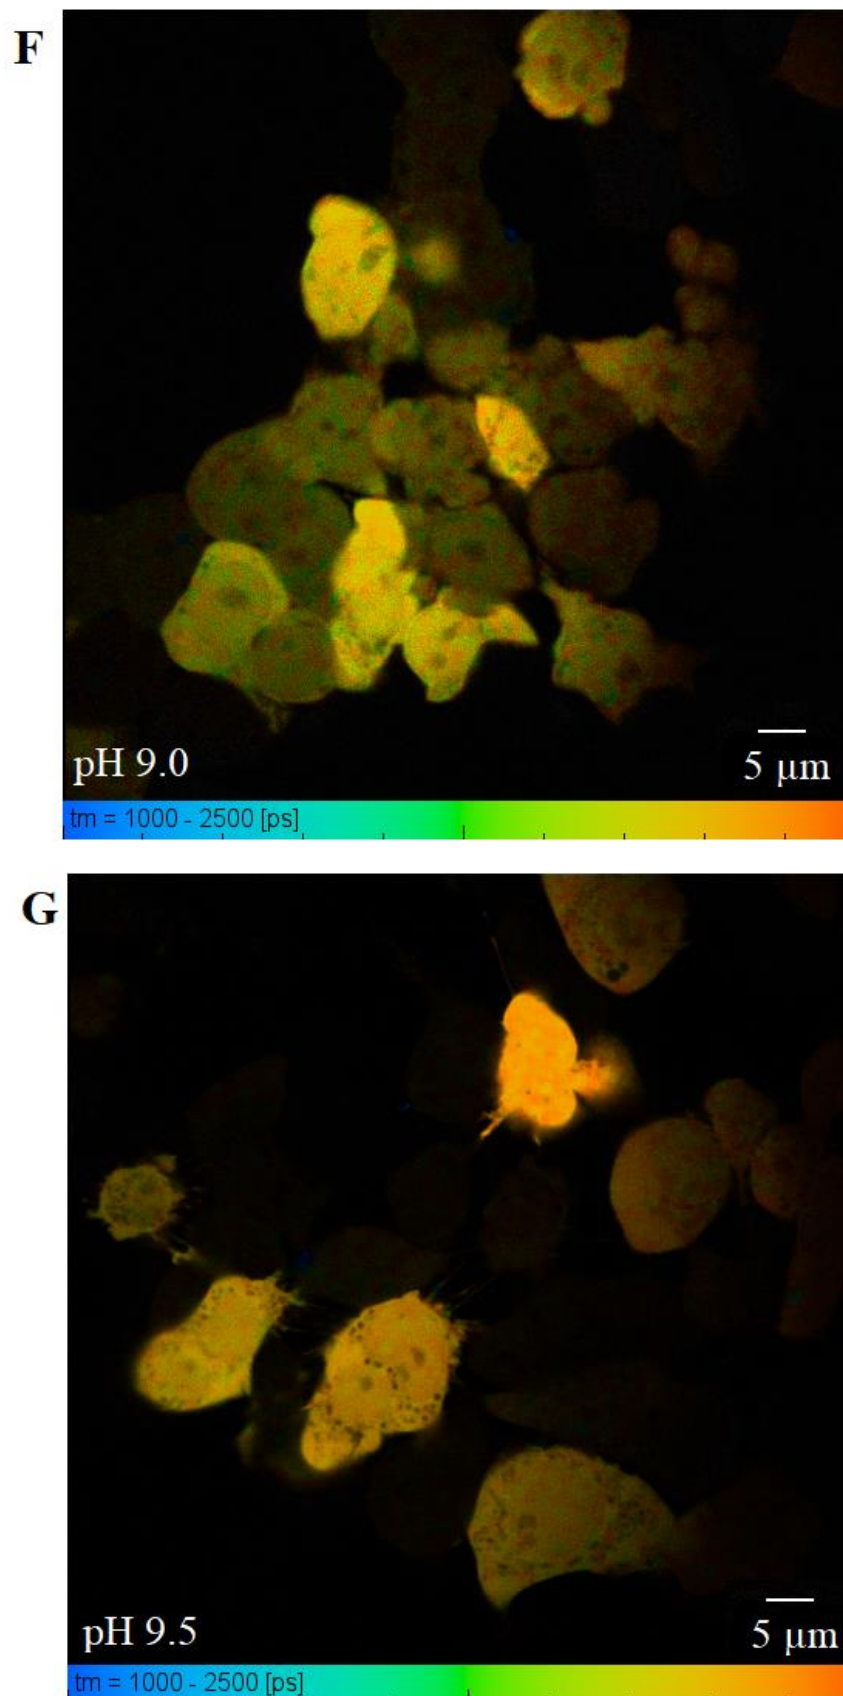

**Figure S2.** FLIM images of the nigericin-treated HEK293 cells expressing cytoplasmic SypHer3s sensor at different pH values: **(A)** pH 6.5; **(B)** pH 7.1; **(C)** pH 7.5; **(D)** pH 8.0; **(E)** pH 8.5; **(F)** pH 9.0; **(G)** pH 9.5;



**A**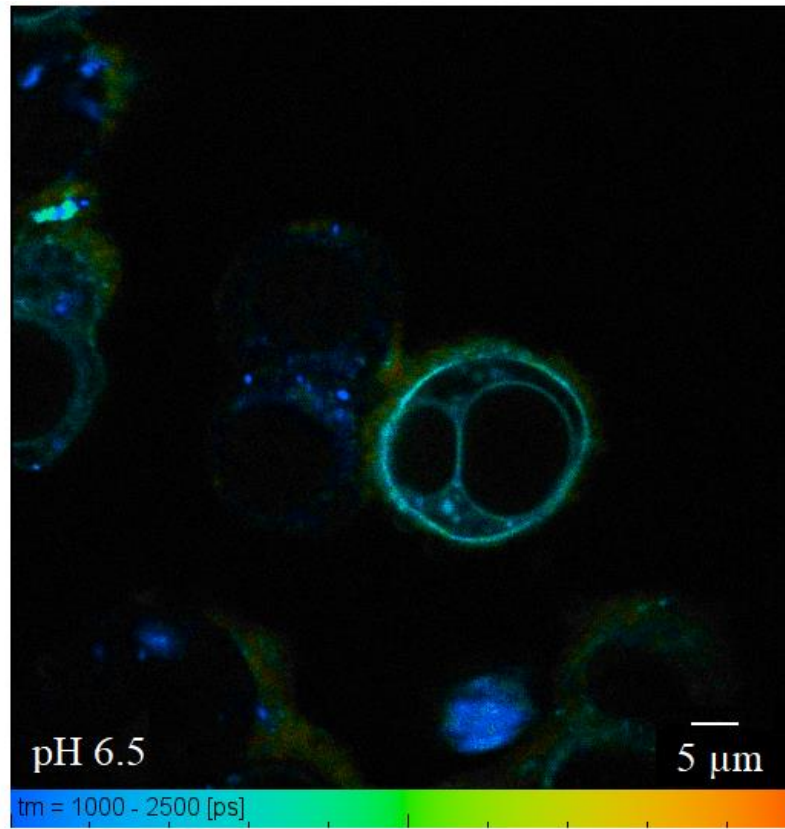**B**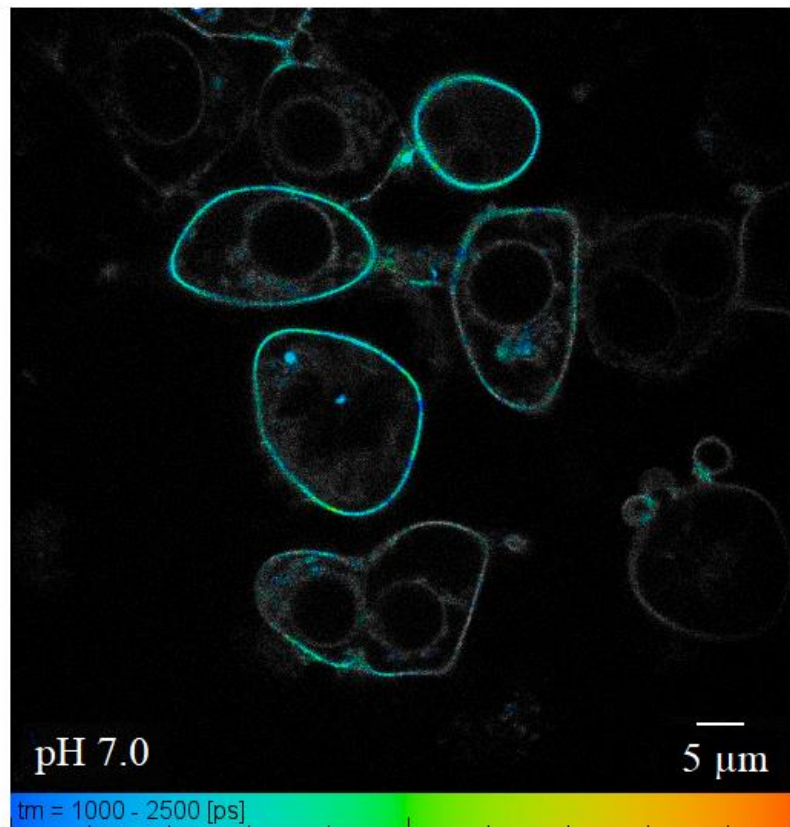

**C**

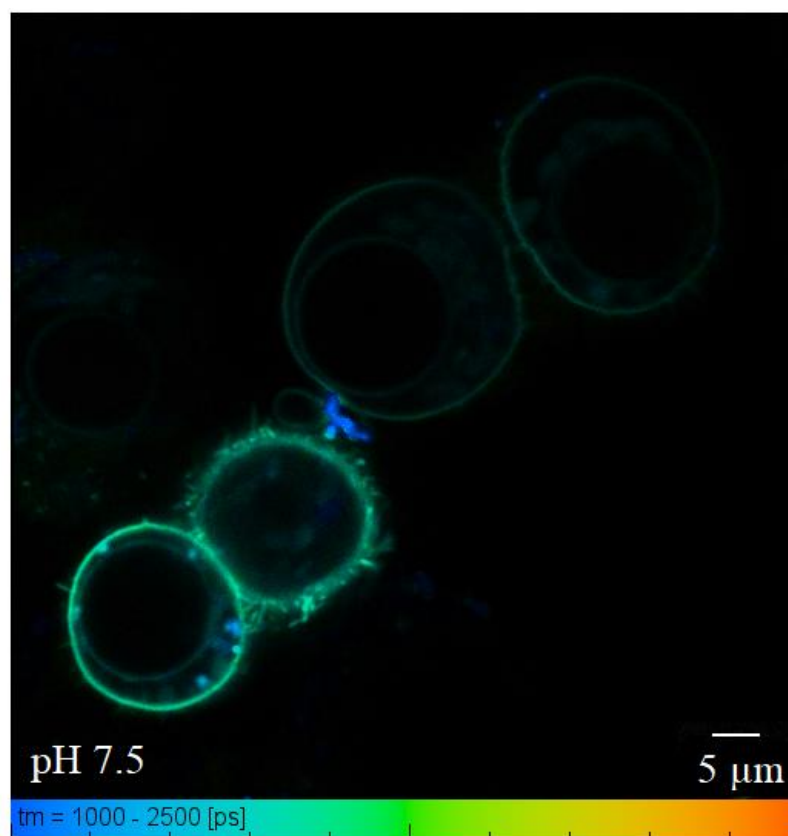

**D**

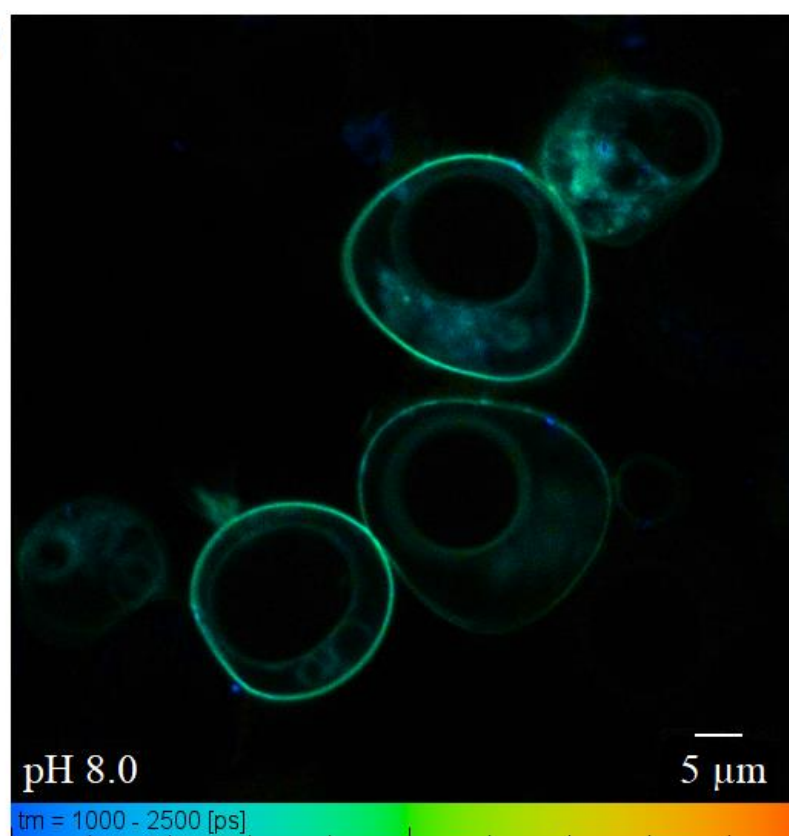

**E**

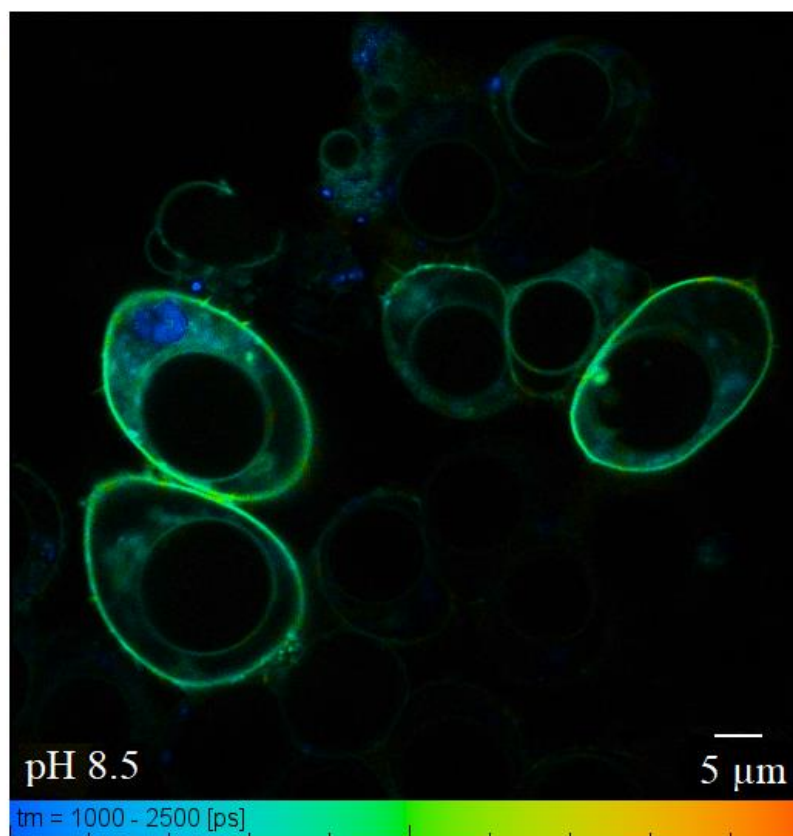

**F**

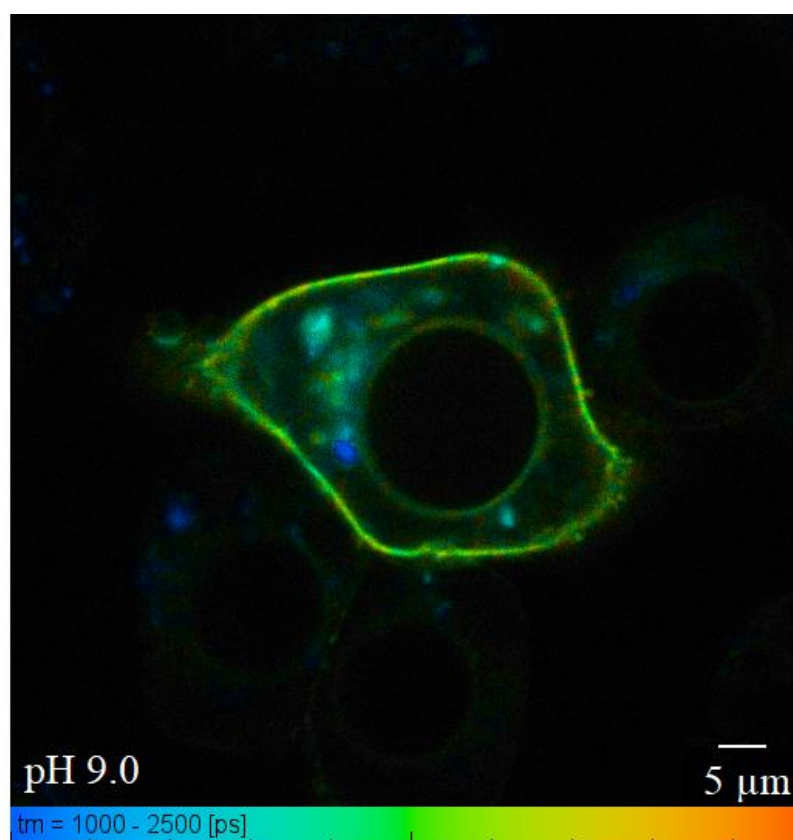

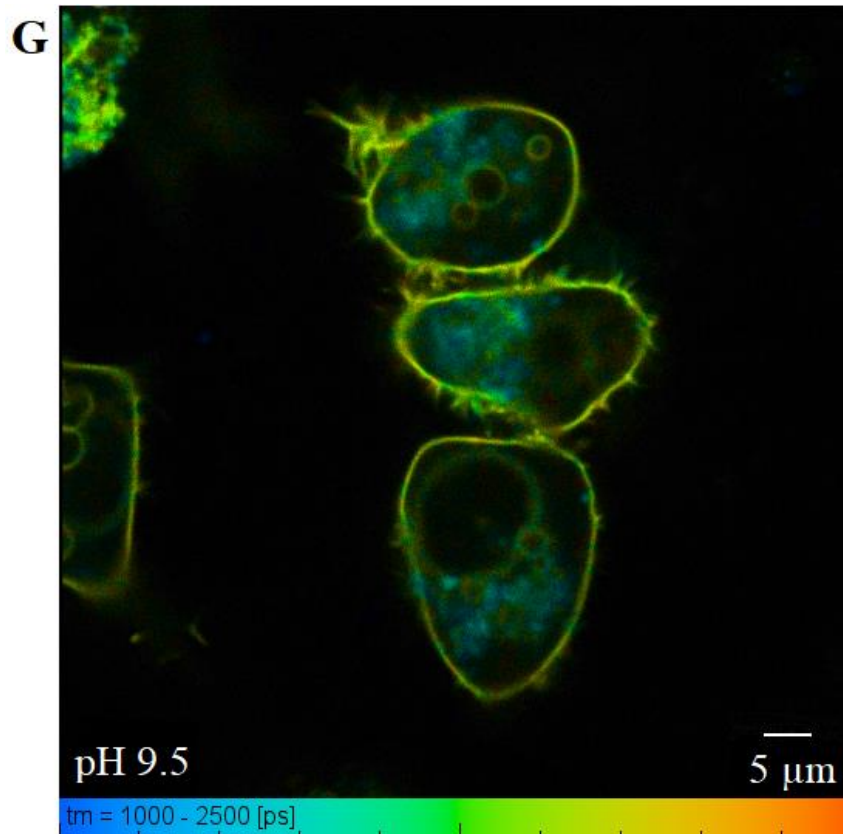

**Figure S3.** FLIM images of the HEK293 cells expressing SypHerExtra sensor at different pH values: **(A)** pH 6.5; **(B)** pH 7.0; **(C)** pH 7.5; **(D)** pH 8.0; **(E)** pH 8.5; **(F)** pH 9.0; **(G)** pH 9.5;

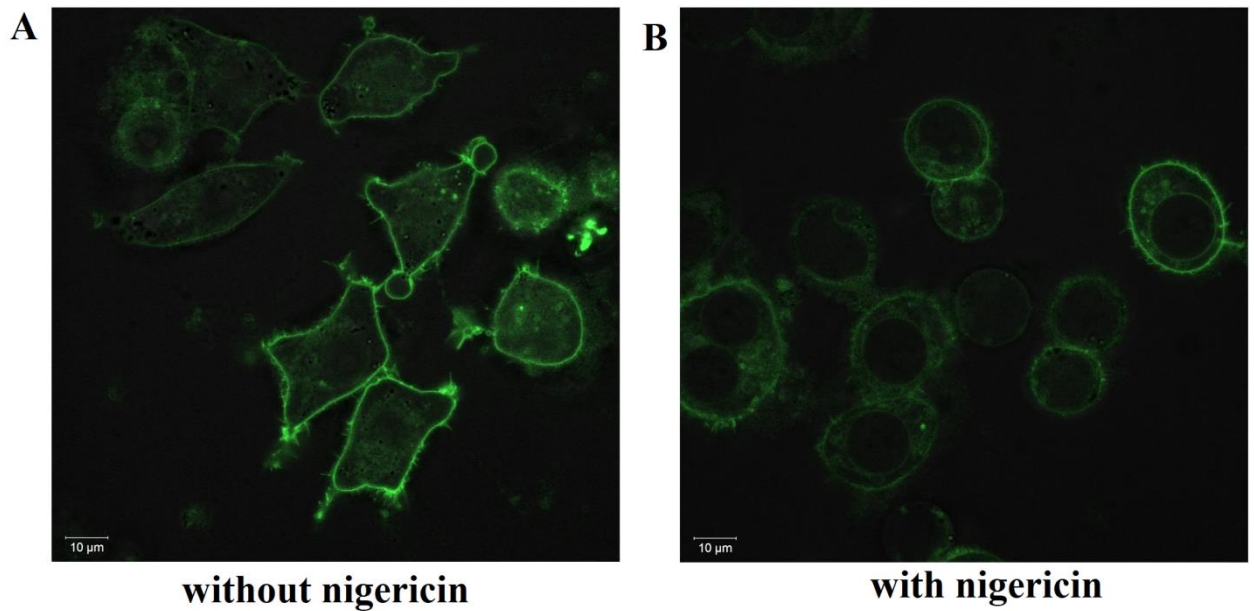

**Figure S4.** Fluorescent images of the HEK293 cells expressing SypHerExtra sensor at pH 8.5 **(A)** without nigericin and **(B)** after incubation with nigericin.
